# Supplementary material for: The Longitudinal Associations of Fitness and Motor Skills with Academic Achievement
Source: PubMed Central journal article supplement — Med Sci Sports Exerc. 2019 May 14;51(10):2050–7. doi: 10.1249/MSS.0000000000002031 (PMC6798746; doi:10.1249/mss.0000000000002031), 2019-05-14
Supplement: mss-51-2050-s002.pdf [file mss-51-2050-s002.pdf]

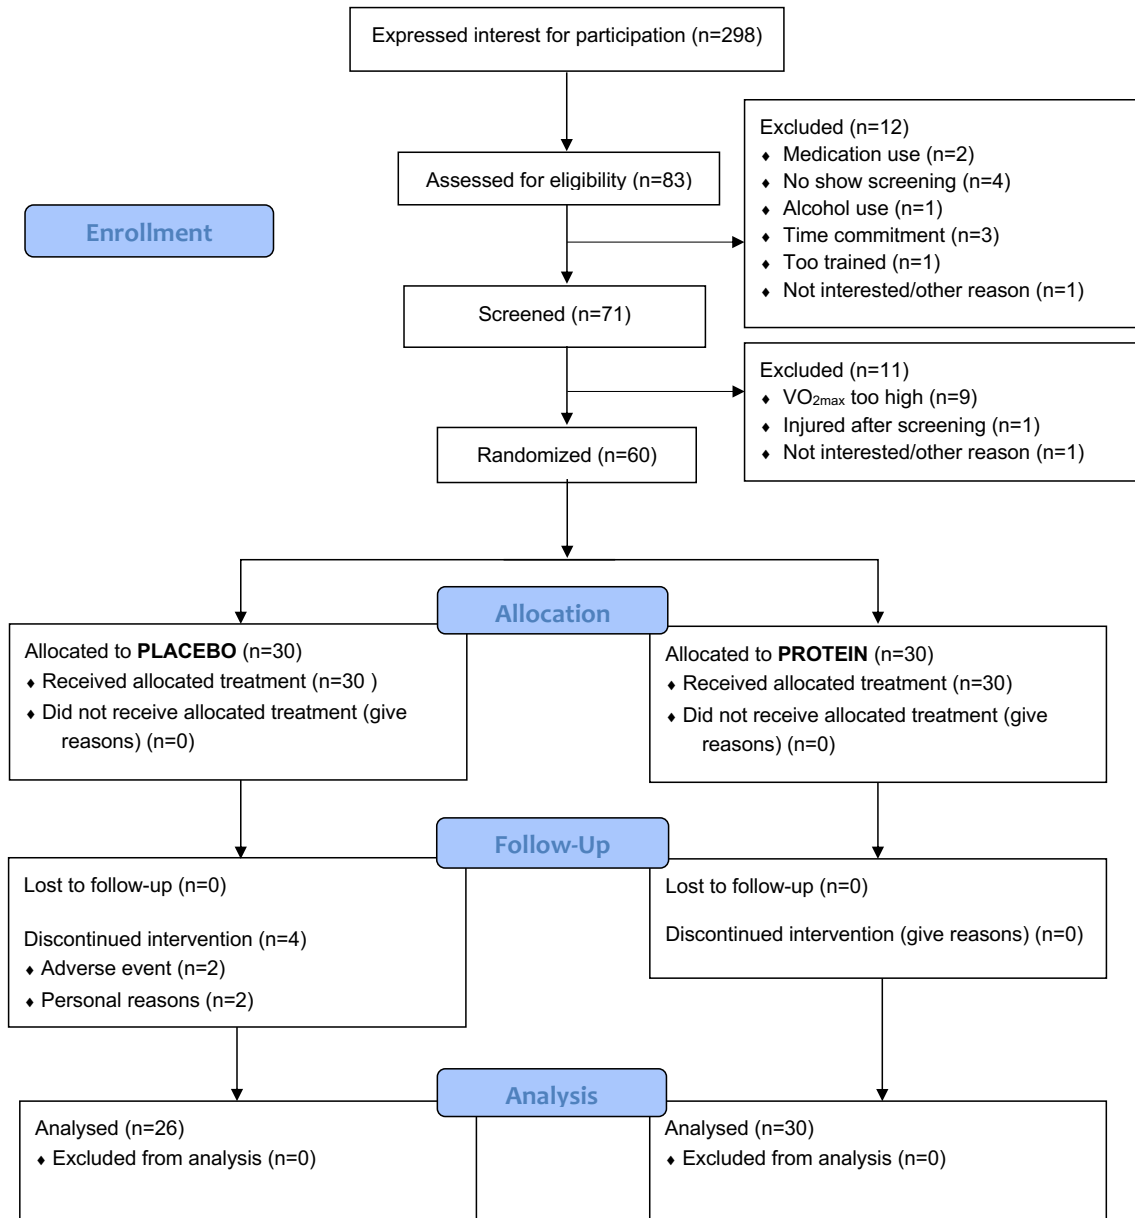

**Supplemental Figure 1.** CONSORT flow diagram. CONSORT, Consolidated Standards of Reporting Trials.
