# Supplementary material for: The Longitudinal Associations of Fitness and Motor Skills with Academic Achievement
Source: PubMed Central journal article supplement — Med Sci Sports Exerc. 2019 May 14;51(10):2050–7. doi: 10.1249/MSS.0000000000002031 (PMC6798746; doi:10.1249/mss.0000000000002031), 2019-05-14
Supplement: mss-51-2050-s003.pdf [file mss-51-2050-s003.pdf]

**Supplemental Table.** Estimated mean differences and effect sizes for performance outcomes and body mass in response to 12 weeks of endurance exercise training in healthy, young males receiving either protein or placebo supplementation

|                                                              | PLA change ( <i>n</i> =26) | PRO change ( <i>n</i> =30) | Mean difference (95% CI) | Effect size (95% CI)  |
|--------------------------------------------------------------|----------------------------|----------------------------|--------------------------|-----------------------|
| VO <sub>2max</sub> (L·min <sup>-1</sup> )                    | 0.35±0.18                  | 0.41±0.17                  | 0.06 (-0.04 to 0.15)     | 0.33 (-0.20 - 0.86)   |
| VO <sub>2max</sub> (mL·min <sup>-1</sup> ·kg <sup>-1</sup> ) | 5±3                        | 5±2                        | 0.46 (-0.91 to 1.83)     | 0.18 (-0.35 - 0.71)   |
| W <sub>max</sub> (W)                                         | 30±17                      | 39±16                      | 8.63 (-0.15 to 17.4)     | 0.53 (-0.006 - 1.06)  |
| W <sub>max</sub> (W·kg <sup>-1</sup> )                       | 0.42±0.24                  | 0.50±0.25                  | 0.081 (-0.05 to 0.21)    | 0.33 (-0.20 - 0.86)   |
| HR <sub>max</sub> (bpm) <sup>1</sup>                         | 0±5                        | 0±5                        | -0.023 (-2.84 to 2.79)   | -0.005 (-0.55 - 0.54) |
| RER <sub>max</sub>                                           | -0.02±0.06                 | -0.02±0.05                 | -0.0015 (-0.03 - 0.03)   | -0.029 (-0.55 - 0.50) |
| Time-trial time (s)                                          | -132±68                    | -165±100                   | -33.7 (-80.3 to 12.8)    | -0.39 (-0.92 - 0.14)  |
| Time-trial mean output (W)                                   | 34±16                      | 42±20                      | 7.93 (-1.92 to 17.8)     | 0.43 (-0.099 - 0.96)  |
| Time-trial mean output (W·kg <sup>-1</sup> )                 | 0.46±0.23                  | 0.54±0.31                  | 0.081 (-0.07 to 0.23)    | 0.29 (-0.24 - 0.82)   |
| 30IK total work (kJ)                                         | 170±173                    | 181±225                    | 11.3 (-97.7 to 120.2)    | 0.056 (-0.47 - 0.581) |
| LM (kg)                                                      | -0.1±1.1                   | 0.5±1.1                    | 0.52 (-0.06 to 1.09)     | 0.48 (-0.053 - 1.01)  |
| Leg LM (kg)                                                  | 0.2±0.6                    | 0.5±0.7                    | 0.32 (-0.03 to 0.66)     | 0.49 (-0.042 - 1.02)  |
| FM (kg)                                                      | -0.7±1.4                   | -0.4±1.2                   | 0.28 (-0.42 to 0.98)     | 0.21 (-0.31 - 0.74)   |
| FM (%)                                                       | -0.7±1.3                   | -0.6±1.2                   | 0.097 (-0.57 to 0.76)    | 0.079 (-0.45 - 0.60)  |

Data are presented as change POST-PRE mean±SD, estimated mean difference between interventions with 95% confidence interval (CI), and effect size with 95% CI. VO<sub>2max</sub>: Maximum oxygen uptake, W<sub>max</sub>: Maximal power, HR<sub>max</sub>: Maximal heart rate, RER: Respiratory exchange ratio: CO<sub>2max</sub>/VO<sub>2max</sub>. LM: lean mass, FM: fat mass. <sup>1</sup>Due to technical failure HR<sub>max</sub> data are shown for *n*=23 in the PLA group.
