# Supplementary material for: The Longitudinal Associations of Fitness and Motor Skills with Academic Achievement
Source: PubMed Central journal article supplement — Med Sci Sports Exerc. 2019 May 14;51(10):2050–7. doi: 10.1249/MSS.0000000000002031 (PMC6798746; doi:10.1249/mss.0000000000002031), 2019-05-14
Supplement: mss-51-2050-s004.pdf [file mss-51-2050-s004.pdf]

**Supplemental Table.** Habitual physical activity level during 12 weeks of endurance exercise training in healthy young males receiving either placebo or protein supplementation

|                          | PLA ( <i>n</i> =26) |          |          | PRO ( <i>n</i> =29) |          |          | <i>P</i> value |                  |
|--------------------------|---------------------|----------|----------|---------------------|----------|----------|----------------|------------------|
|                          | Pre                 | Week 6   | Week 12  | Pre                 | Week 6   | Week 12  | Time           | Time x treatment |
| Sedentary (%)            | 62.8±6.2            | 61.3±5.1 | 59.9±7.6 | 63.7±6.4            | 64.8±7.4 | 65.1±8.8 | 0.60           | 0.054            |
| Light (%)                | 25.1±3.6            | 26.0±3.8 | 25.7±3.7 | 24.9±4.3            | 23.7±4.8 | 23.7±5.7 | 0.82           | 0.065            |
| Moderate to vigorous (%) | 12.1±3.6            | 12.7±2.6 | 13.0±3.2 | 11.4±2.8            | 11.5±3.4 | 10.9±3.4 | 0.68           | 0.13             |

Pre, week 6 and week 12 data are presented as means±SD and are all normally distributed. Week 6 data were missing from 1 participant in the PRO group.
